# Supplementary material for: Oral Health Literacy Levels of Nursing Professionals and Effectiveness of Integrating Oral Health Training into Nursing Curricula: A Systematic Review
Source: MDPI journal article supplement (doi:10.3390/app131810403), 2023-09-17
Supplement: s1 [file s1]

Archive with 4 entries (4 files):
- applsci-2571789-supplementary tables.pdf
- Suppl Figure S1. Nurses with poor oral health knowledge.JPG
- Suppl Figure S2. Knowledge score.JPG
- Suppl Figure S3. Attitudes scores.JPG
