# Supplementary figures and images for: Oral Health Literacy Levels of Nursing Professionals and Effectiveness of Integrating Oral Health Training into Nursing Curricula: A Systematic Review
Source: MDPI journal article supplement (doi:10.3390/app131810403), 2023-09-17

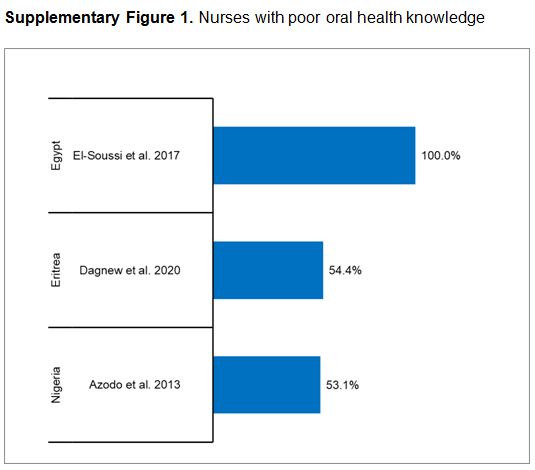

Supplement: s1 [file s1 › Suppl Figure S1. Nurses with poor oral health knowledge.JPG]

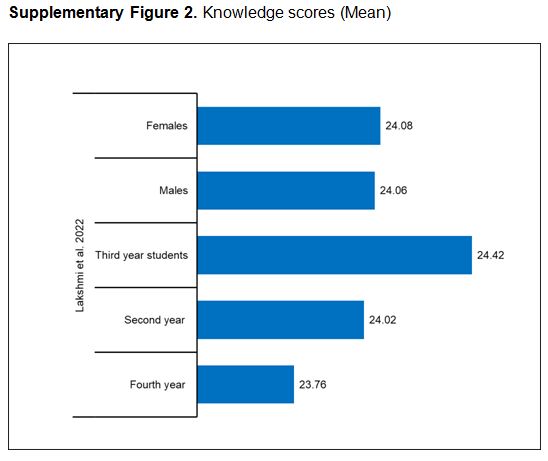

Supplement: s1 [file s1 › Suppl Figure S2. Knowledge score.JPG]

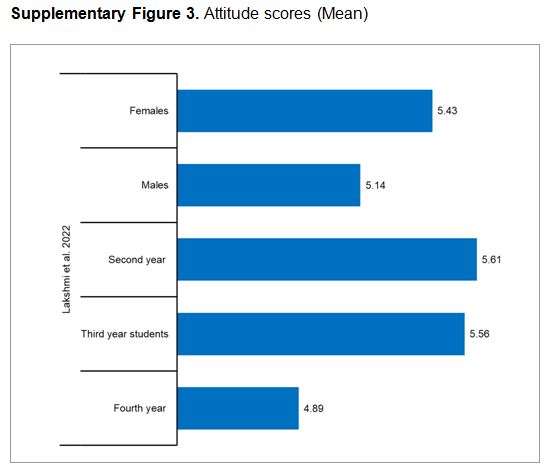

Supplement: s1 [file s1 › Suppl Figure S3. Attitudes scores.JPG]
